# Supplementary material for: Development of an ion gel-based CO2 separation membrane composed of Pebax 1657 and a CO2-philic ionic liquid
Source: Royal Society of Chemistry journal article supplement (doi:10.1039/d3ra08730a), 2024-01-01
Supplement: d3ra08730a1.pdf [file d3ra08730a1.pdf]

## Supporting Information

### Development of an ion gel-based CO<sub>2</sub> separation membrane composed of Pebax 1657 and a CO<sub>2</sub>-philic ionic liquid

Jo Muroga,<sup>a,b</sup> Eiji Kamio,<sup>a,b,\*</sup> Atsushi Matsuoka,<sup>a,b</sup> Keizo Nakagawa,<sup>a,c</sup> Tomohisa Yoshioka,<sup>a,c</sup> and Hideto Matsuyama,<sup>a,b,\*</sup>

<sup>a</sup> Research Center for Membrane and Film Technology, Kobe University, 1-1 Rokkodai-cho, Nada-ku, Kobe 657-8501, Japan

<sup>b</sup> Department of Chemical Science and Engineering, Kobe University, 1-1 Rokkodai-cho, Nada-ku, Kobe 657-8501, Japan

<sup>c</sup> Graduate School of Science, Technology, and Innovation, Kobe University, 1-1 Rokkodai-cho, Nada-ku, Kobe 657-8501, Japan

\*To whom all correspondence should be addressed.

E-mail: e-kamio@people.kobe-u.ac.jp (E.K.), matuyama@kobe-u.ac.jp (H.M.)

#### Table of Contents

|                                                                                                                                                                                                                           |      |
|---------------------------------------------------------------------------------------------------------------------------------------------------------------------------------------------------------------------------|------|
| Figure S1 FTIR spectra of the Pebax 1657 membrane without [Emim][C(CN) <sub>3</sub> ] and the Pebax ion gel membrane with different [Emim][C(CN) <sub>3</sub> ] contents.                                                 | p. 2 |
| Figure S2 Schematic illustration of the speculated gel network structure and toughening mechanism.                                                                                                                        | p. 3 |
| Figure S3 Comparison of the CO <sub>2</sub> and N <sub>2</sub> permeabilities and the CO <sub>2</sub> /N <sub>2</sub> permselectivity of the Pebax ion gel membrane and pure Pebax 1657 membrane without an ionic liquid. | p.4  |

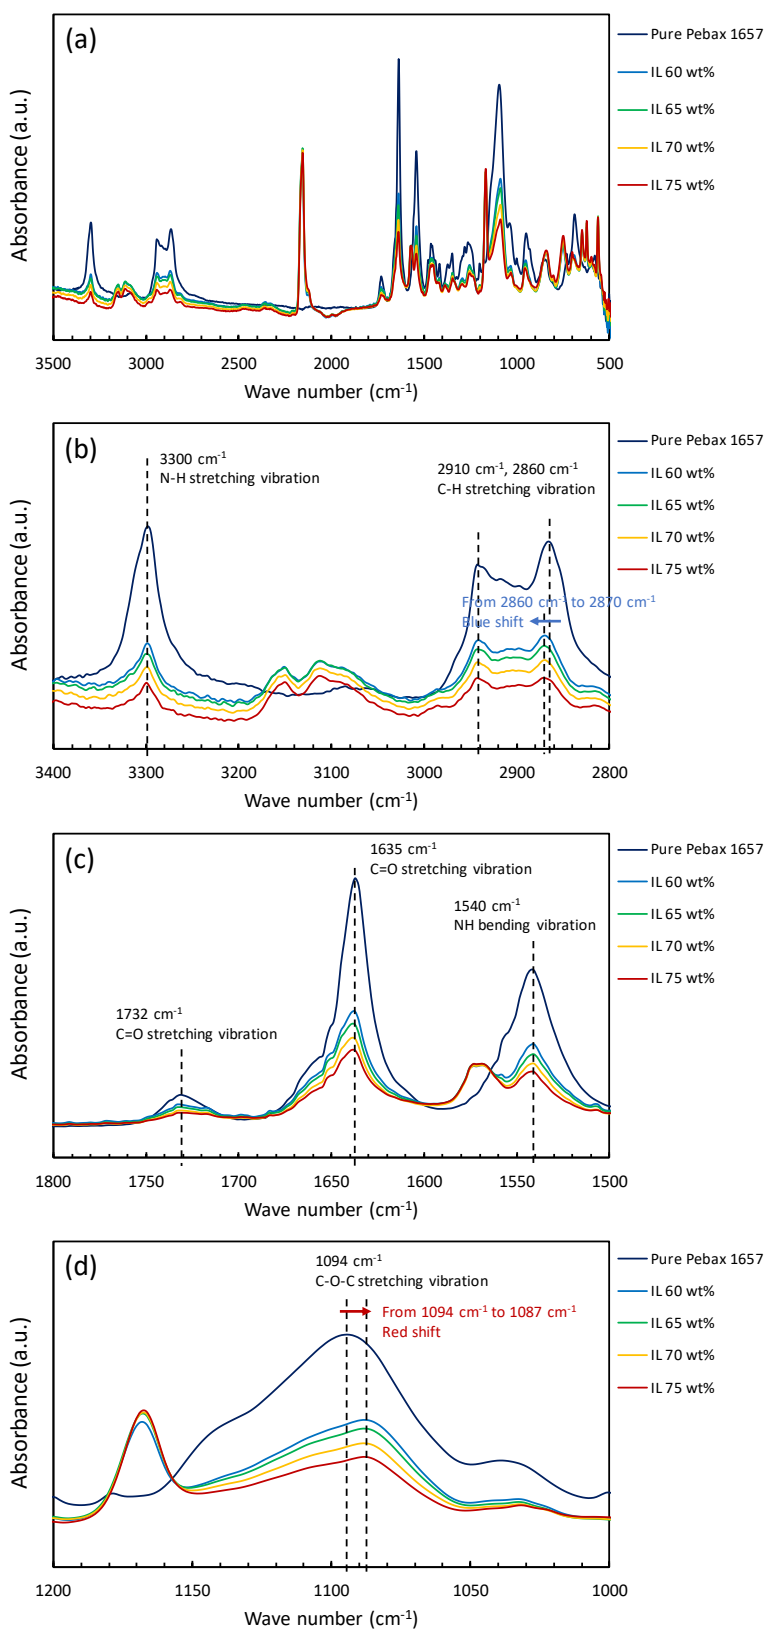

**Figure S1** FTIR spectra of the Pebax 1657 membrane without  $[\text{Emim}][\text{C}(\text{CN})_3]$  and the Pebax ion gel membrane with different  $[\text{Emim}][\text{C}(\text{CN})_3]$  contents

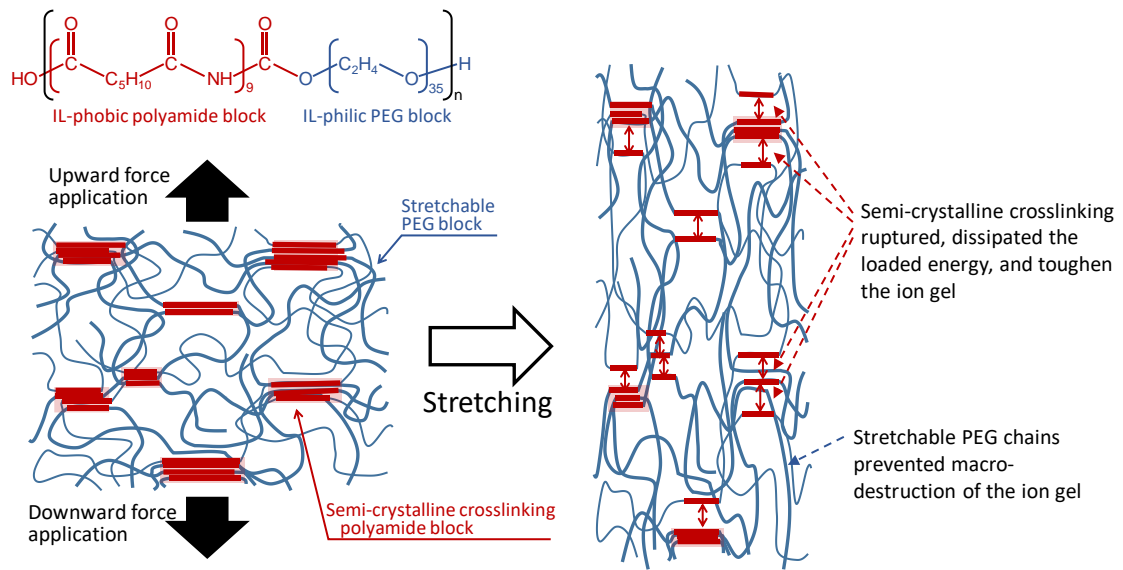

**Figure S2** Schematic illustration of the speculated gel network structure and toughening mechanism

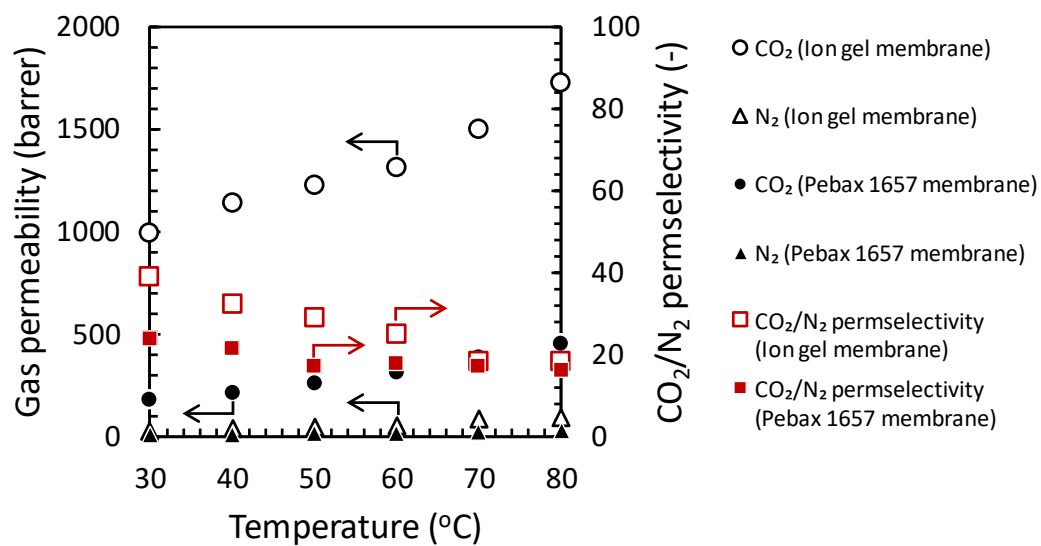

**Figure S3** Comparison of the CO<sub>2</sub> and N<sub>2</sub> permeabilities and the CO<sub>2</sub>/N<sub>2</sub> permselectivity of the Pebax ion gel membrane and pure Pebax 1657 membrane without an ionic liquid.
